# Supplementary material for: Microfluidic valvular chips and a numerical lymphatic vessel model for the study of lymph transport characteristics
Source: Royal Society of Chemistry journal article supplement (doi:10.1039/d1lc00022e), 2021-01-01
Supplement: d1lc00022e1.pdf [file d1lc00022e1.pdf]

Electronic Supplementary Information (ESI) for

## **Microfluidic valvular chip and numerical lymphatic vessel model for study of lymph transport characteristics**

Jaemin In, Jihye Ryu, Hyeonji Yu, Dongwon Kang, Taeyoung Kim, and Jungwook Kim\*

Department of Chemical and Biomolecular Engineering, Sogang University, Seoul, South Korea.

Correspondence to: [jungwkim@sogang.ac.kr](mailto:jungwkim@sogang.ac.kr)

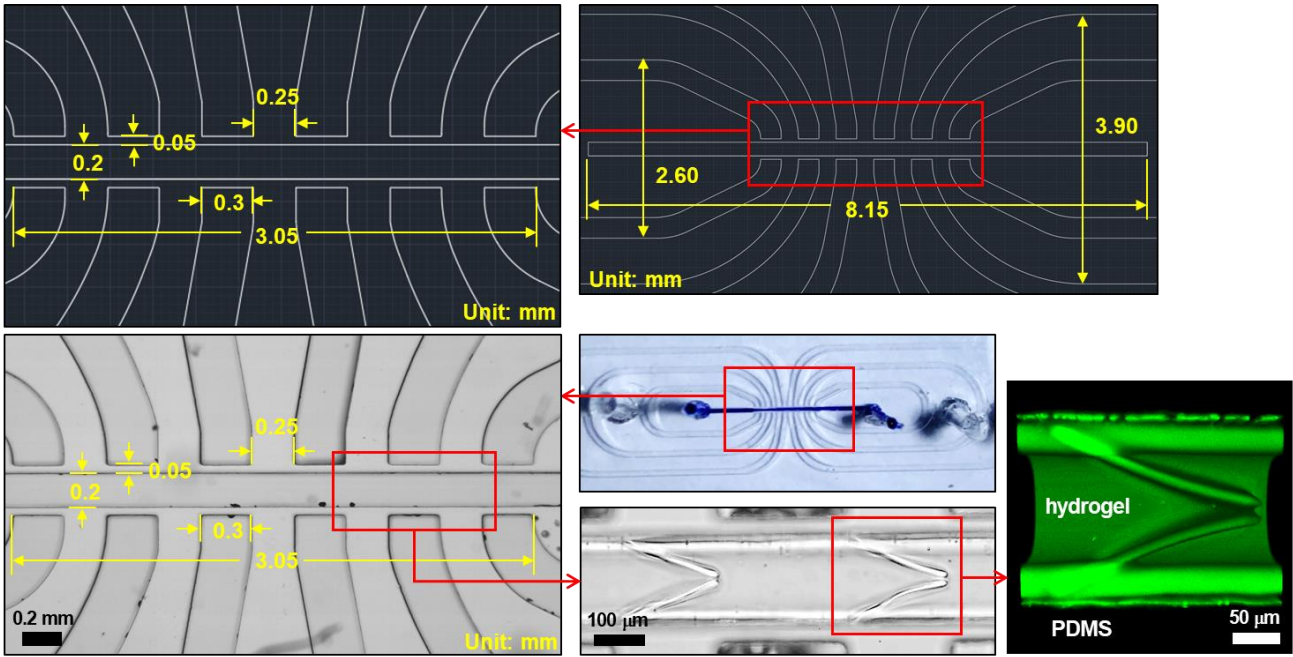

**Figure S1.** Details of the geometry and dimensions of the PDMS microfluidic device and hydrogel luminal structure with the bicuspid valve leaflets. Top images correspond to the CAD design.

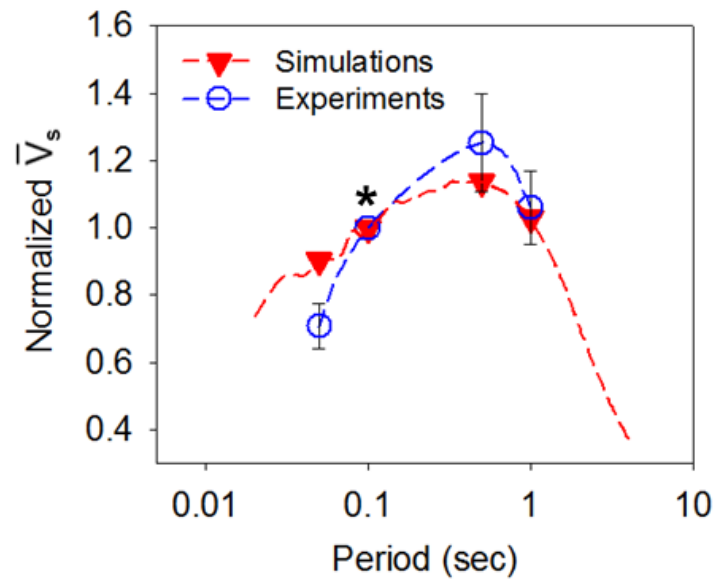

**Figure S2.** The simulation results for the dependency of  $\bar{V}_s$  on the compression period was reproduced experimentally using the microfluidic valvular chip. An asterisk indicates the data points used for normalization of experimental and numerical results.

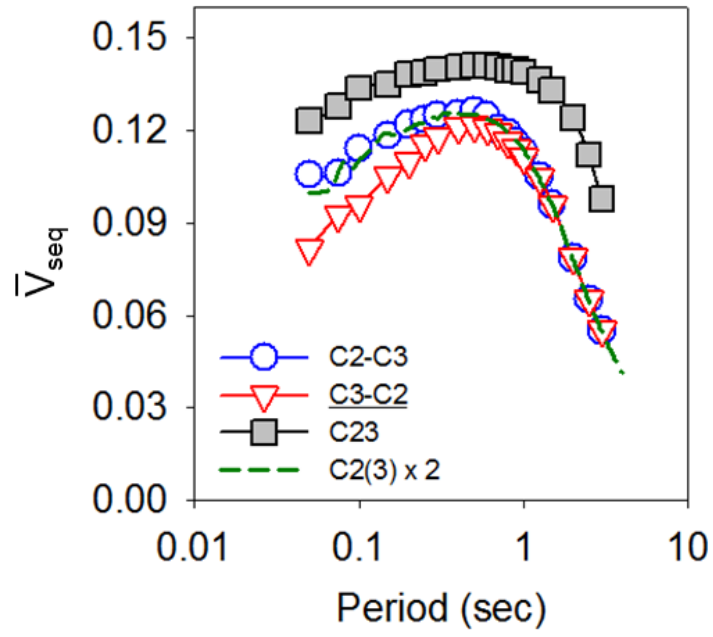

**Figure S3.** The dependency of  $\bar{V}_{seq}$  on the compression period for varying sequences. The optimum periods corresponding to the maximum  $\bar{V}_{seq}$  are 0.6, 0.5, 0.4, and 0.5 s for C23, C2-C3, C2(3), and C3-C2, respectively. The phase delay is 1.0, and the contraction fraction is 6 %.

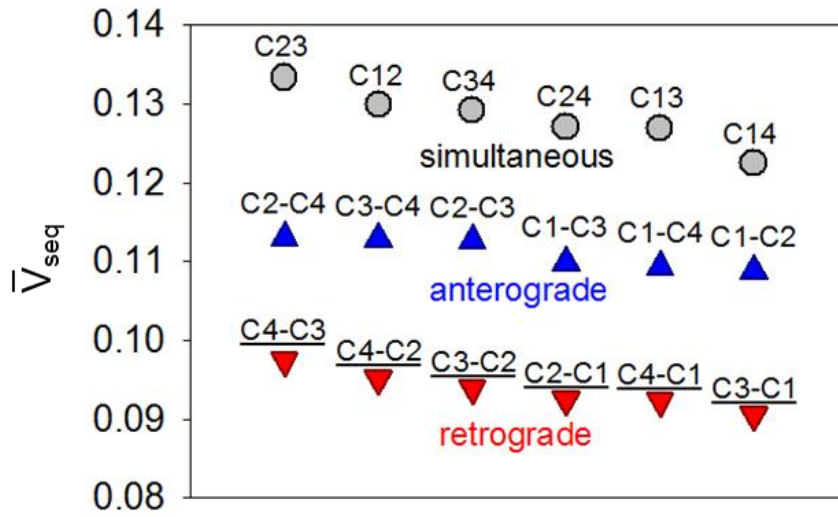

**Figure S4.**  $\bar{V}_{seq}$  calculated for various sequences of compressing two chambers, which are indicated above each data point. The contraction fraction is 6 %, and the period is 0.1 sec. The phase delay for the anterograde and retrograde sequences is 1.0.

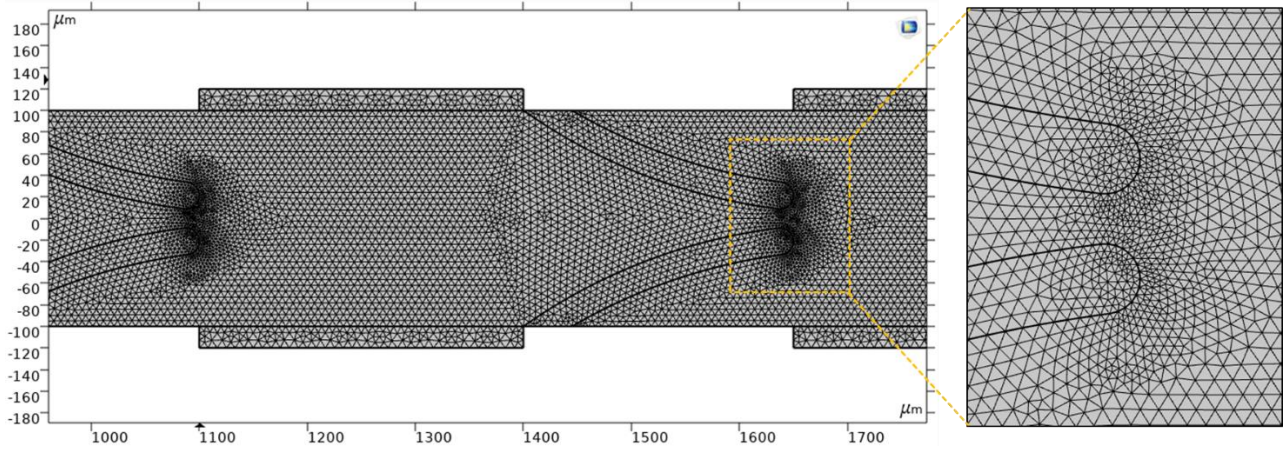

**Figure S5.** The numerical lymphatic vessel model constructed in the Fluid-Structure Interaction interface using COMSOL. 56,498 elements were used to mesh the model, where the fluid mesh was refined in regions between the valve leaflets (right).

**Table S1.** Comparisons in geometry and mechanical properties between the rat mesenteric lymphatic vessel and our systems.

|                |                      | Rat mesenteric lymphatic vessel       | Our systems                           |                                       | Ref.  |
|----------------|----------------------|---------------------------------------|---------------------------------------|---------------------------------------|-------|
|                |                      |                                       | Microfluidic chip                     | Numerical model                       |       |
| Geometry       | $L_{v-to-v}$         | 400-500 $\mu\text{m}$                 | 550 $\mu\text{m}$                     | 550 $\mu\text{m}$                     | 6     |
|                | $L_v$                | 120-140 $\mu\text{m}$                 | 210 $\mu\text{m}$                     | 250 $\mu\text{m}$                     | 6     |
|                | $D$                  | 100-300 $\mu\text{m}$                 | 125 $\mu\text{m}$                     | 200 $\mu\text{m}$                     | 6     |
|                | $d_0$                | 2 $\mu\text{m}^*$                     | 5-10 $\mu\text{m}$                    | 20 $\mu\text{m}$                      | 6     |
| Valve leaflet  | Young's modulus      | 58 kPa <sup>#</sup>                   | 40 kPa                                | Soft: 40 kPa<br>Rigid: 4 MPa          | 11    |
|                | Poisson's ratio      | 0.45 <sup>*</sup>                     | Not measured                          | 0.49                                  | 11    |
| Lymph          | Viscosity            | 1.08-1.36 mPa·sec                     | 1/3-3 mPa·sec                         | 0.89 mPa·sec (water)                  | 2     |
|                | Density              | 1.005-1.016 g/ml                      | 1.00 g/ml (water)                     | 1.00 g/ml (water)                     | 2     |
| Active pumping | Contraction fraction | 5-50 %                                | 0-20 %                                | 0-22 %                                | 18    |
|                | Period               | ~0.5-3 sec                            | 0.05-1 sec                            | 0.01-5 sec                            | 19-21 |
|                | Phase delay          | 0-0.5 <sup>*</sup>                    | 0-2                                   | 0-3                                   | 3, 8  |
|                | Sequence             | Antero- and retro-grade, simultaneous | Antero- and retro-grade, simultaneous | Antero- and retro-grade, simultaneous | 3     |
|                | Pressure difference  | $\pm 20 \text{ mmH}_2\text{O}^*$      | Not applied                           | $\pm 8 \text{ mmH}_2\text{O}$         | 7     |

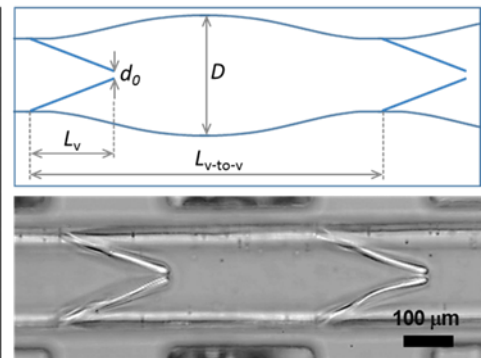

\* These are values used in the existing analytical or numerical studies based on the in vivo or ex vivo measurements.

# Shear modulus of 20 kPa was converted to Young's modulus assuming isotropic and homogeneous materials with Poisson's ratio of 0.45.

**Table S2.** Sequences of compression of four adjacent chambers classified based on  $N_s$  and  $N_r$ . Number in parentheses indicates total number of sequences in each classification.

| $N_r \backslash N_s$ | 1                                                                                                     | 2                                                                                                                                                                                   | 3                                             | 4             |
|----------------------|-------------------------------------------------------------------------------------------------------|-------------------------------------------------------------------------------------------------------------------------------------------------------------------------------------|-----------------------------------------------|---------------|
| 0                    | (1) 1-2-3-4                                                                                           | (3) 12-3-4 1-23-4<br>1-2-34                                                                                                                                                         | (2) 1-234 123-4                               | (1) 1234      |
| 1                    | (11) 1-2-4-3 1-3-2-4<br>1-3-4-2 1-4-2-3 2-1-3-4<br>2-3-1-4 2-3-4-1 2-4-1-3<br>3-1-2-4 3-4-1-2 4-1-2-3 | (22) 12-4-3 1-24-3<br>13-2-4 1-3-24 13-4-2<br>1-34-2 14-2-3 1-4-23<br>2-13-4 2-1-34 23-1-4<br>2-3-14 23-4-1 2-34-1<br>24-1-3 2-4-13 3-12-4<br>3-1-24 34-1-2 3-4-12<br>4-12-3 4-1-23 | (6) 124-3 134-2<br>2-134 234-1 3-124<br>4-123 | Not available |
| 2                    | (11) 1-4-3-2 2-1-4-3<br>2-4-3-1 3-1-4-2 3-2-1-4<br>3-2-4-1 3-4-2-1 4-1-3-2<br>4-2-1-3 4-2-3-1 4-3-1-2 | (11) 14-3-2 2-14-3<br>24-3-1 3-14-2 3-2-14<br>3-24-1 34-2-1 4-13-2<br>4-2-13 4-23-1 4-3-12                                                                                          | Not available                                 | Not available |
| 3                    | (1) 4-3-2-1                                                                                           | Not available                                                                                                                                                                       | Not available                                 | Not available |
